# Supplementary material
Source: PubMed Central journal article supplement (PMC3064850)
Supplement: 97320630006035S1.pdf [file 97320630006035S1.pdf]

## Supplementary material:

**Table 1:** Comparison of the H-bonds and salt bridge contacts between interacting residues in the docked CA2009 HA - 2D1 complex and those in the 1918SC HA-2D1 co-crystal. Residues within the 'Sa' antigenic site are indicated in bold font. Residue numbers of the heavy and light chain are prefixed with H and L respectively.

| HA 1918SC-2D1 |             |        |              | CA2009 HA -2D1 |             |        |              |
|---------------|-------------|--------|--------------|----------------|-------------|--------|--------------|
| HA1 residue   | 2D1 residue | Type   | Distance (Å) | HA1 residue    | 2D1 residue | Type   | Distance (Å) |
| 125S          | L-91        | H-bond | 3.0          | 119E           | H-58        | H-bond | 3.0          |
| 126S          | L-93        | H-bond | 3.2          | 119E           | L-95        | H-bond | 3.2          |
| <b>129N</b>   | H-97        | H-bond | 3.2          | 123K           | H-54        | H-bond | 2.2          |
| <b>157N</b>   | H52         | Salt   | 3.7          | 123 K          | H-54        | Salt   | 2.2          |
| <b>157N</b>   | H54         | Salt   | 3.0          | 126S           | L-93        | H-bond | 3.2          |
| 160S          | H-97        | H-bond | 3.0          | <b>166K</b>    | L-31        | H-bond | 2.1          |
| 160S          | H-99        | H-bond | 2.5          | <b>166K</b>    | L-93        | H-bond | 1.9          |
| 161Y          | H-99        | H-bond | 3.1          | <b>166K</b>    | L-93        | Salt   | 1.9          |
| 161Y          | H100        | H-bond | 3.1          | <b>167S</b>    | L-30        | H-bond | 3.2          |
| <b>163K</b>   | H-100       | H-bond | 2.7          | 171D           | L-94        | H-bond | 2.7          |
| <b>163K</b>   | H-100       | Salt   | 2.7          |                |             |        |              |
| <b>166K</b>   | L-31        | H-bond | 2.9          |                |             |        |              |
| <b>166K</b>   | L-93        | H-bond | 2.7          |                |             |        |              |
| <b>166K</b>   | L-93        | Salt   | 2.7          |                |             |        |              |
| <b>167S</b>   | L-30        | H-bond | 3.1          |                |             |        |              |
